# Supplementary material for: Kretzoiarctos gen. nov., the Oldest Member of the Giant Panda Clade
Source: PLOS journal article supplement (doi:10.1371/journal.pone.0048985), 2012-11-14
Supplement: S3 (10.1371/journal.pone.0048985.s003) [file journal.pone.0048985.s003]

PLOS One


Skip to main content

Advertisement

- plos.org
- Create account
- Sign in

- - Publish
  - About
  - Browse
- Searchadvanced search
- Browse Topics

Browse Subject Areas

?

Click through the PLOS taxonomy to find articles in your field.

For more information about PLOS Subject Areas, click
here.

February 11, 2025

# We believe in a better future where science is open to all, for all.

Image credit: PLOS One

### Calling all experts!

#### PLOS One is seeking talented individuals to join our editorial board.

APPLY NOW

07/17/2025

Ecology

## Canopy insect communities are shaped by the genes and phenotypes of their aspen hosts

Morrow and colleagues identified the genetic links between heritable aspen tree traits and the insect herbivore communities they host. Tree size, leaf metabolites, leaf thickness, and nutritional composition all influenced insect species diversity, with 88 aspen genes found to drive these interactions.

Image credit: Canyon Nature Trail by Famartin, CC BY-SA 3.0

07/17/2025

Scientific Integrity

## Widespread misidentification of scanning electron microscope instruments in the peer-reviewed materials science and engineering literature

Richardson and colleagues correlate the misidentification of SEM instrumentation in materials science and engineering literature with increased post-publication reports of irreproducibility, errors and impropriety. Such inconsistencies are discussed as potential markers for paper mills.

Image credit: First Scanning Electron Microscope  by Dr. rer. nat. Alexander von Ardenne,  CC BY-SA 3.0.

07/17/2025

Generative AI

## Language in vivo vs. in silico: Size matters but Larger Language Models still do not comprehend language on a par with humans due to impenetrable semantic reference

Dentella and colleagues compared the responses of human participants against large language models (LLM) in grammaticality judgments. Despite high performance by ChatGPT-4, key differences remain in how LLMs and humans process language, suggesting that increasing model size alone may not reduce the comprehension gap.

Image credit: Artificial Intelligence by Tung Nguyen, Pixabay

07/24/2025

Digital Health

## Enhancing tuberculosis treatment support: A thematic analysis of interactive messages in a digital adherence technology trial to identify needs, challenges, and strategies for improvement

Roberti and colleagues highlight the importance of personalized, empathetic communication, and reliable technology to enhance the effectiveness of digital adherence technologies for tuberculosis treatment.

Image credit: Doctor hands using a modern tablet by Freepik, Freepik

07/16/2025

EveryONE

## How we build meaningful collaboration

PLOS One Academic Editors Saima Ahmad and Aloysius Odii share their thoughts on the question "how do you build a meaningful collaboration?“

Image credit: A group of people holding hands on top of a tree by Shane Rounce, Unsplash

07/14/2025

EveryONE

## Editor Spotlight: Daniel Paiva Silva

In this interview, PLOS One Academic Editor Daniel Paiva Silva discusses his editorial role, assessing manuscripts, and his experience with fieldwork.

Image credit: Daniel de Paiva Silva by Daniel de Paiva Silva, CC BY 4.0

07/16/2025

EveryONE

## Editor Spotlight: Taiyi He

In this interview, PLOS One Academic Editor Taiyi He the importance of regional population and green development research, his experience as an editor, and his approach to achieving a thorough peer review process

Image credit: Taiyi He by Taiyi He, CC BY 4.0

07/30/2025

Cognitive Psychology

## Impact of web accessibility on cognitive engagement in individuals without disabilities: Evidence from a psychophysiological study

Ekin and colleagues show that accessibility features enhance engagement and readability.

Image credit: Website by Mudassar Iqbal, Pixabay

07/28/2025

Urban Environment

## Exploring the influence of path environment factors on walking behavior in urban parks with configuration attribute control

Kang and colleagues examine how walking behavior in parks is affected by pathway attributes.

Image credit: Bridge, Park by Roman Grac, Pixabay

07/17/2025

Marine Ecology

## Genetic clustering within massive *Porites* species complex is the primary driver of holobiont assembly

Scott and colleagues demonstrate the effect of coral genetics on their algal and microbial symbionts

Image credit: Fig 1 by Carly B. Scott et al., CC BY 4.0

07/09/2025

Research Article

## An eel-like robot based on a dielectric elastomer

Zhang presents an efficient and high-stability eel-inspired swimming robot.

Image credit: Fig 1 by Chenghong Zhang CC BY 4.0

Collections

- ### Aging in Human Health and Disease

  In this collection, PLOS One highlights multidisciplinary research in the area of aging.
- ### Complex Systems in Healthcare

  This joint collection of PLOS One and PLOS Complex Systems articles focuses on the use of complex systems research in the healthcare context.
- ### Collections

  Browse the lastest collections of papers from across PLOS.

1   of   3

Meet our staff at conferences

- ### 7th International Conference on Statistics: Theory and Applications

  Associate Editor Joanna Tindall will be representing PLOS One at this conference in Paris, France, August 17th-19th 2025.
- ### Conferences 2025

  New opportunities to meet our editorial staff will be announced soon.

1   of   2

### Publish with PLOS

- Submission Instructions
- Submit Your Manuscript

EveryONE

Posted July 24

How does our understanding of historic peatlands imform our approach t…

Jenny Tucker

Posted July 16

How we build meaningful collaboration

Shein Ei Cho

Posted July 14

Editor Spotlight: Daniel Paiva Silva

Jenny Tucker

Posted June 16

Editorial Spotlight: Taiyi He

PLOS

See All Blogs

### Connect with Us

- Contact Us
- RSS
- PLOS One on Bluesky
- PLOS on Facebook
- PLOS Blogs

## Get new content from PLOS One in your inbox

PLOS will use your email address to provide content from PLOS One.
You can find out more about how PLOS processes your data by reading our
Privacy Policy.
You can unsubscribe at any time by clicking the unsubscribe link in our emails or by contacting us at privacy@plos.org.

PLOS One | ISSN: 1932-6203 (online)


- Publications
- PLOS Biology
- PLOS Climate
- PLOS Complex Systems
- PLOS Computational Biology
- PLOS Digital Health
- PLOS Genetics
- PLOS Global Public Health

- PLOS Medicine
- PLOS Mental Health
- PLOS Neglected Tropical Diseases
- PLOS One
- PLOS Pathogens
- PLOS Sustainability and Transformation
- PLOS Water

- Home
- Blogs
- Collections
- Give feedback
- LOCKSS

- Privacy Policy
- Terms of Use
- Advertise
- Media Inquiries
- Contact

PLOS is a nonprofit 501(c)(3) corporation, #C2354500, based in California, US

### Cookie Preference Center

Our website uses different types of cookies. Optional cookies will only be set with your consent and you may withdraw this consent at any time. Below you can learn more about the types of cookies PLOS uses and register your cookie preferences.

Accept All Cookies

### Customize Your Cookie Preference

+**Strictly Necessary**

Always On

+**Functional**

OnOff

+**Performance and Analytics**

OnOff

+**Marketing**

OnOff

Save Selected Preferences and Close

For more information about the cookies and other technologies used by us, please read our Cookie Policy.
